# Supplementary material
Source: PubMed Central journal article supplement (PMC4235593)
Supplement: Supp_Fig1.pdf [file Supp_Fig1.pdf]

## Supplementary Data

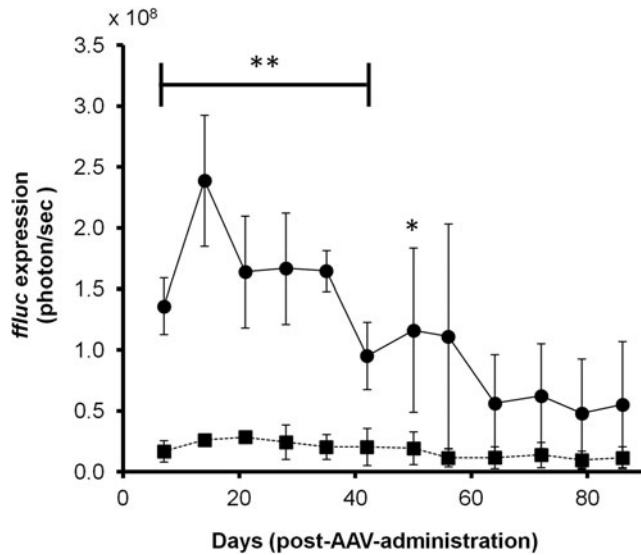

**SUPPLEMENTARY FIG. S1.** Long-term AAV9 gene expression in nasal cavities of C57BL/6 mice previously infected with *Bb*. Animals were transduced with AAV9.*ffluc* on day 14 of a *Bb* infection and imaged for *ffluc* expression every week until day 86 post-AAV administration. *Bb*-infected mice show significantly lower nasal cavity luminescence than that observed from uninfected controls through day 50 (\*\* $p < 0.01$ , \* $p < 0.05$ , Student's *t*-test,  $n = 6$  at day 7,  $n = 3$  for all other time points). ●— PBS, AAV9; -■- *Bb*, AAV9. AAV, adeno-associated virus; *Bb*, *Bordetella bronchiseptica*; *ffluc*, firefly luciferase; PBS, phosphate-buffered saline.
