# Supplementary material
Source: PubMed Central journal article supplement (PMC4235593)
Supplement: Supp_Fig2-3.pdf [file Supp_Fig2-3.pdf]

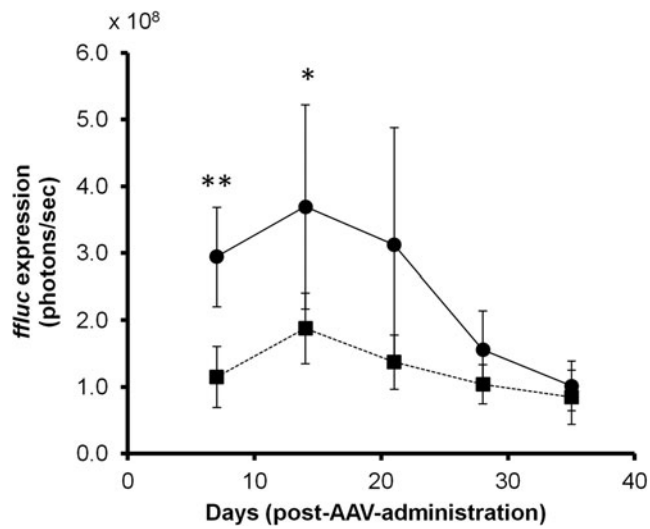

**SUPPLEMENTARY FIG. S2.** Long-term AAV9 gene expression in nasal cavities of SP-D knockout mice previously infected with PAO1 (AAV on day 2 postinfection). Animals were transduced with AAV9.*ffluc* on day 2 of a PAO1 infection and imaged for *ffluc* expression every week until day 35 post-AAV administration. PAO1-infected mice show significantly lower nasal cavity luminescence than that observed from uninfected mice through days 7 and 14 postinfection (\*\* $p < 0.01$ , \* $p < 0.05$ , Student's *t*-test, day 7 uninfected  $n = 6$ , day 7 infected  $n = 10$ , for all other time points uninfected  $n = 3$  and infected  $n = 6$ ). ●— PBS, AAV9, ■- - Bb, AAV9. SP-D, surfactant protein D.

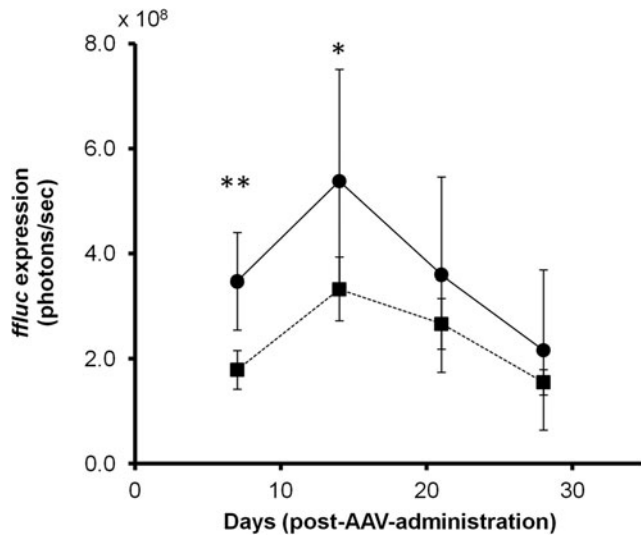

**SUPPLEMENTARY FIG. S3.** Long-term AAV9 gene expression in nasal cavities of SP-D knockout mice previously infected with PAO1 (AAV on day 9 postinfection). Animals were transduced with AAV9,*ffluc* on day 9 of a PAO1 infection and imaged for *ffluc* expression every week until day 28 post-AAV administration. PAO1-infected mice show significantly lower nasal cavity luminescence than that observed from uninfected controls through days 7 and 14 postinfection (\*\* $p < 0.01$ , \* $p < 0.05$ , Student's *t*-test, day 7 uninfected  $n = 6$ , day 7 infected  $n = 8$ , for all other time points uninfected  $n = 3$  and infected  $n = 4$ ). ●— PBS, AAV9, - -■ - Bb, AAV9.
