# Supplementary material
Source: PubMed Central journal article supplement (PMC4235593)
Supplement: Supp_Fig4.pdf [file Supp_Fig4.pdf]

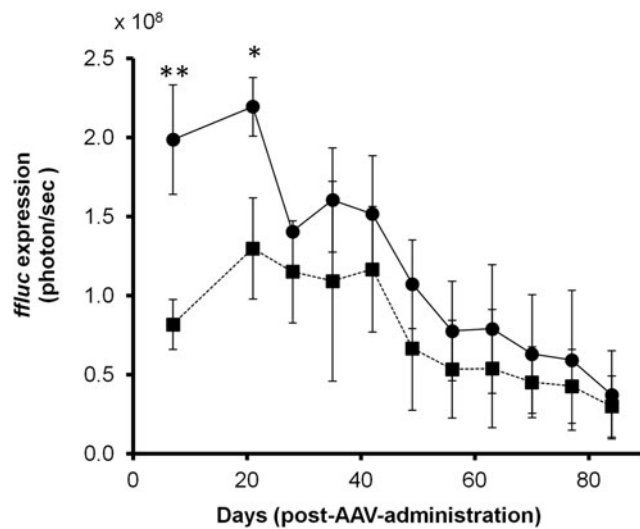

**SUPPLEMENTARY FIG. S4.** Long-term AAV9 gene expression in nasal cavity of SP-A knockout mice previously infected with PAO1. Animals were transduced with AAV9.*ffluc* on day 2 of a PAO1 infection and imaged for *ffluc* expression approximately every week until day 85 post-AAV administration. PAO1-infected mice show significantly lower nasal cavity luminescence than that of uninfected mice only at days 7 and 21 post-AAV administration (\*\* $p < 0.01$ , \* $p < 0.05$ , Student's *t*-test, day 7 uninfected  $n = 7$ , day 7 infected  $n = 7$ , for all other time points: uninfected  $n = 3$  and infected  $n = 4$ ). ●— PBS, AAV9, -■- - *Bb*, AAV9.
